# Supplementary material for: Power-law statistics in blinking SERS of thiacyanine adsorbed on a single silver nanoaggregate
Source: Royal Society of Chemistry journal article supplement (doi:10.1039/c000824a), 2010-01-01
Supplement: c000824a.pdf [file c000824a.pdf]

## Electronic Supplementary Information

### Power-law statistics in blinking SERS of thiocyanine adsorbed on a single silver nanoaggregate

Yasutaka Kitahama,<sup>\*a,b</sup> Yuhei Tanaka,<sup>a</sup> Tamitake Itoh<sup>b</sup> and Yukihiro Ozaki<sup>a</sup>

<sup>a</sup> *Department of Chemistry, School of Science and Technology, Kwansei Gakuin University, Sanda, Hyogo 669-1337, Japan. E-mail: kitahama@kwansei.ac.jp; Fax: +81 79 565 9077; Tel: +81 79 565 8349*

<sup>b</sup> *Nano-Bioanalysis Team, Health Technology Research Center, National Institute of Advanced Industrial Science and Technology (AIST), Takamatsu, Kagawa 761-0395, Japan.*

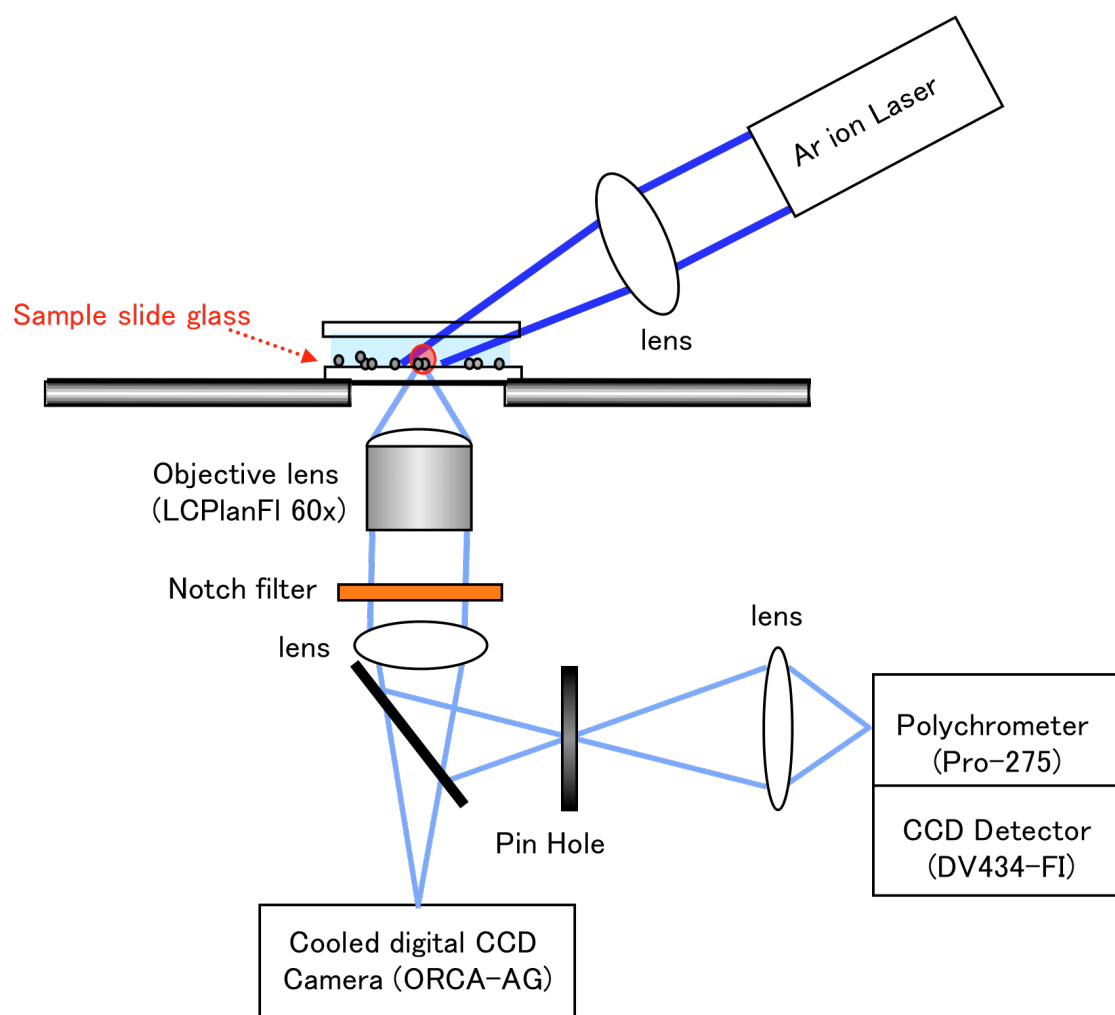

**Fig. S1.** An experimental setup employed in the present study to observe SERS video images and spectra of individual Ag nanoaggregates.

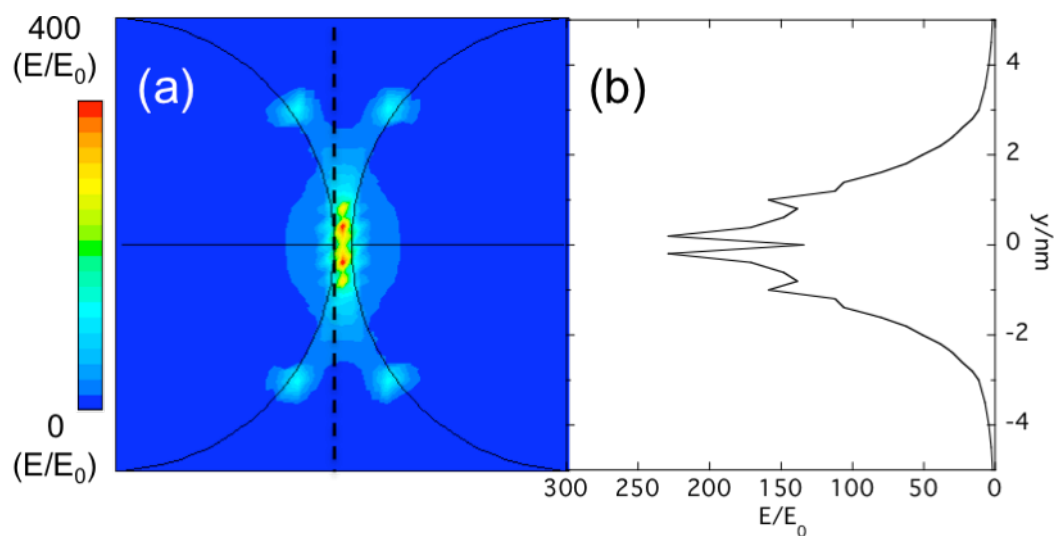

**Fig. S2.** (a) Calculated spatial distribution of the EM field around the gap of Ag nanoparticles using 0.2 nm mesh around the gap. The 458 nm horizontal polarization excites the particles of 10 nm in diameter with the gap of 0.4 nm. (b) Calculated intensity of the EM field along the vertical broken line in (a).
